# Supplementary material
Source: Research Square preprint supplement (doi:10.21203/rs.3.rs-8972766/v1)
Supplement: Supplementary file 1 [file 19cd82fac7c2e8a6a6bdf46a.docx]

**Iron-Doped Nickel Disulfide as an Efficient Polysulfide Barrier for High-Performance Lithium-Sulfur Batteries**

Liming Song2,3, Feiyu Wang2, Qiang Liu1,2*, Xianwu Li2, Yong Xiang4,5, Jie Tan5*

1. School of Mechanical Engineering University of Science and Technology Beijing

E-mail: liuq@chinanhl.com

2. Inner Mongolia North Hauler Joint Stock Co., Ltd, Baotou 014010, China

3. Inner Mongolia University of Science & Technology, Baotou 014010, China

4. Institute of Electronic and Information Engineering of UESTC in Guangdong, Dong Guan 523808, China

5. School of Materials and Energy, University of Electronic Science and Technology of China, Chengdu 611731, China

E-mail: jietan_material@std.uestc.edu.cn

**Acknowledgments**

This work was supported by the Inner Mongolia Autonomous Region Science and Technology Program (Grant Nos. 2025YFHH0167 and 2023YFKL0019) and the Key-Area Research and Development Program of Dongguan (Grant No. 20241201300022).

**Figure S1** SEM image of Ni-MOF.

**
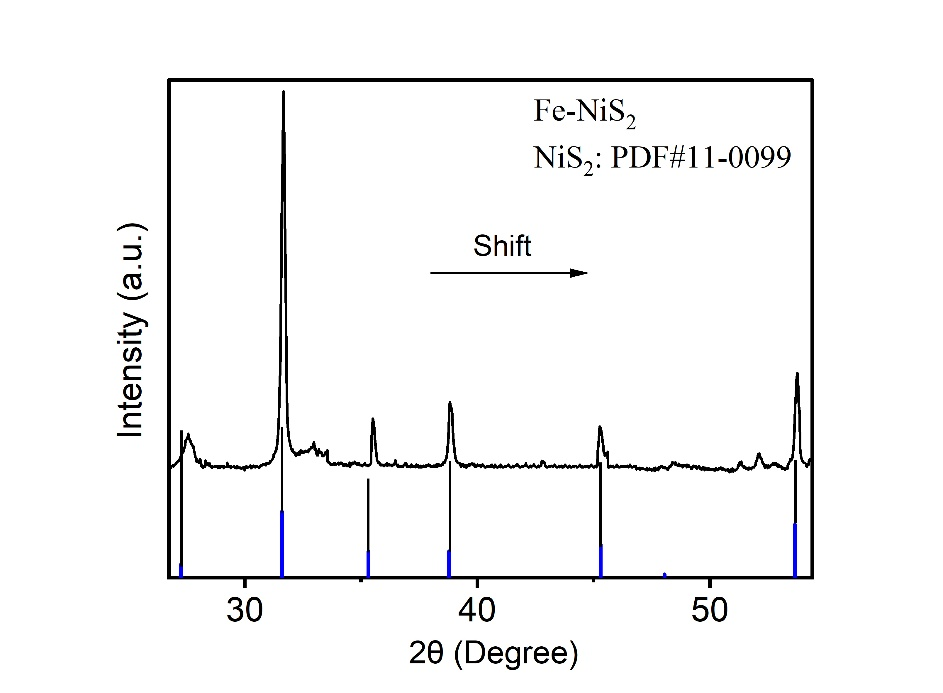
**

**Figure S2** XRD pattern of Fe-NiS2.


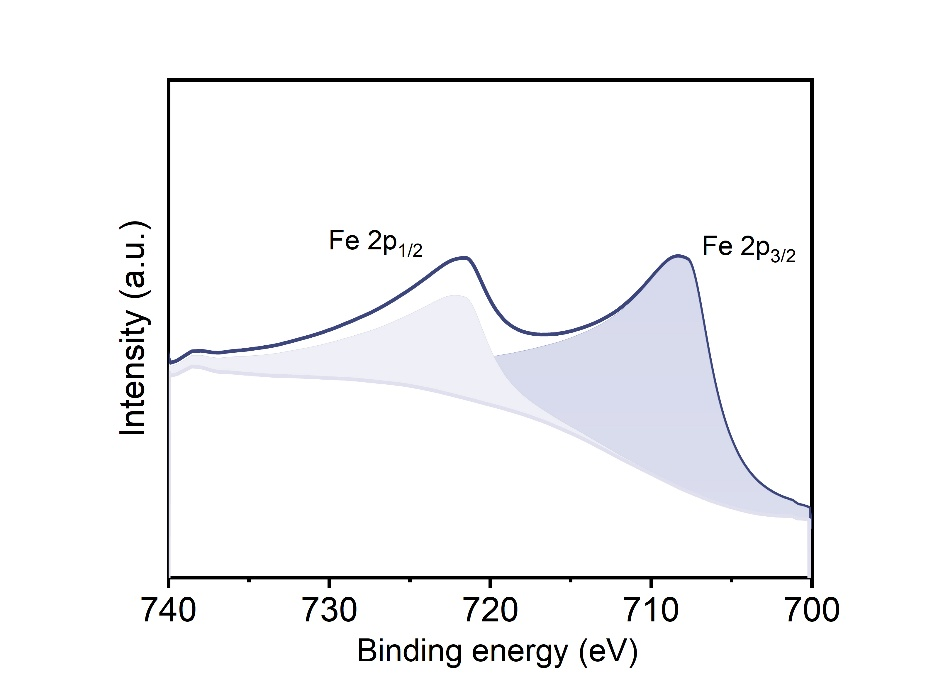


**Figure S3** XPS spectrum of Fe 2p for Fe-NiS2.


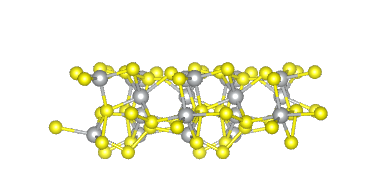

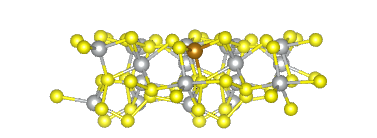


**Figure S4** Front view of the (210) crystal plane structure of NiS2 and Fe-NiS2.

**
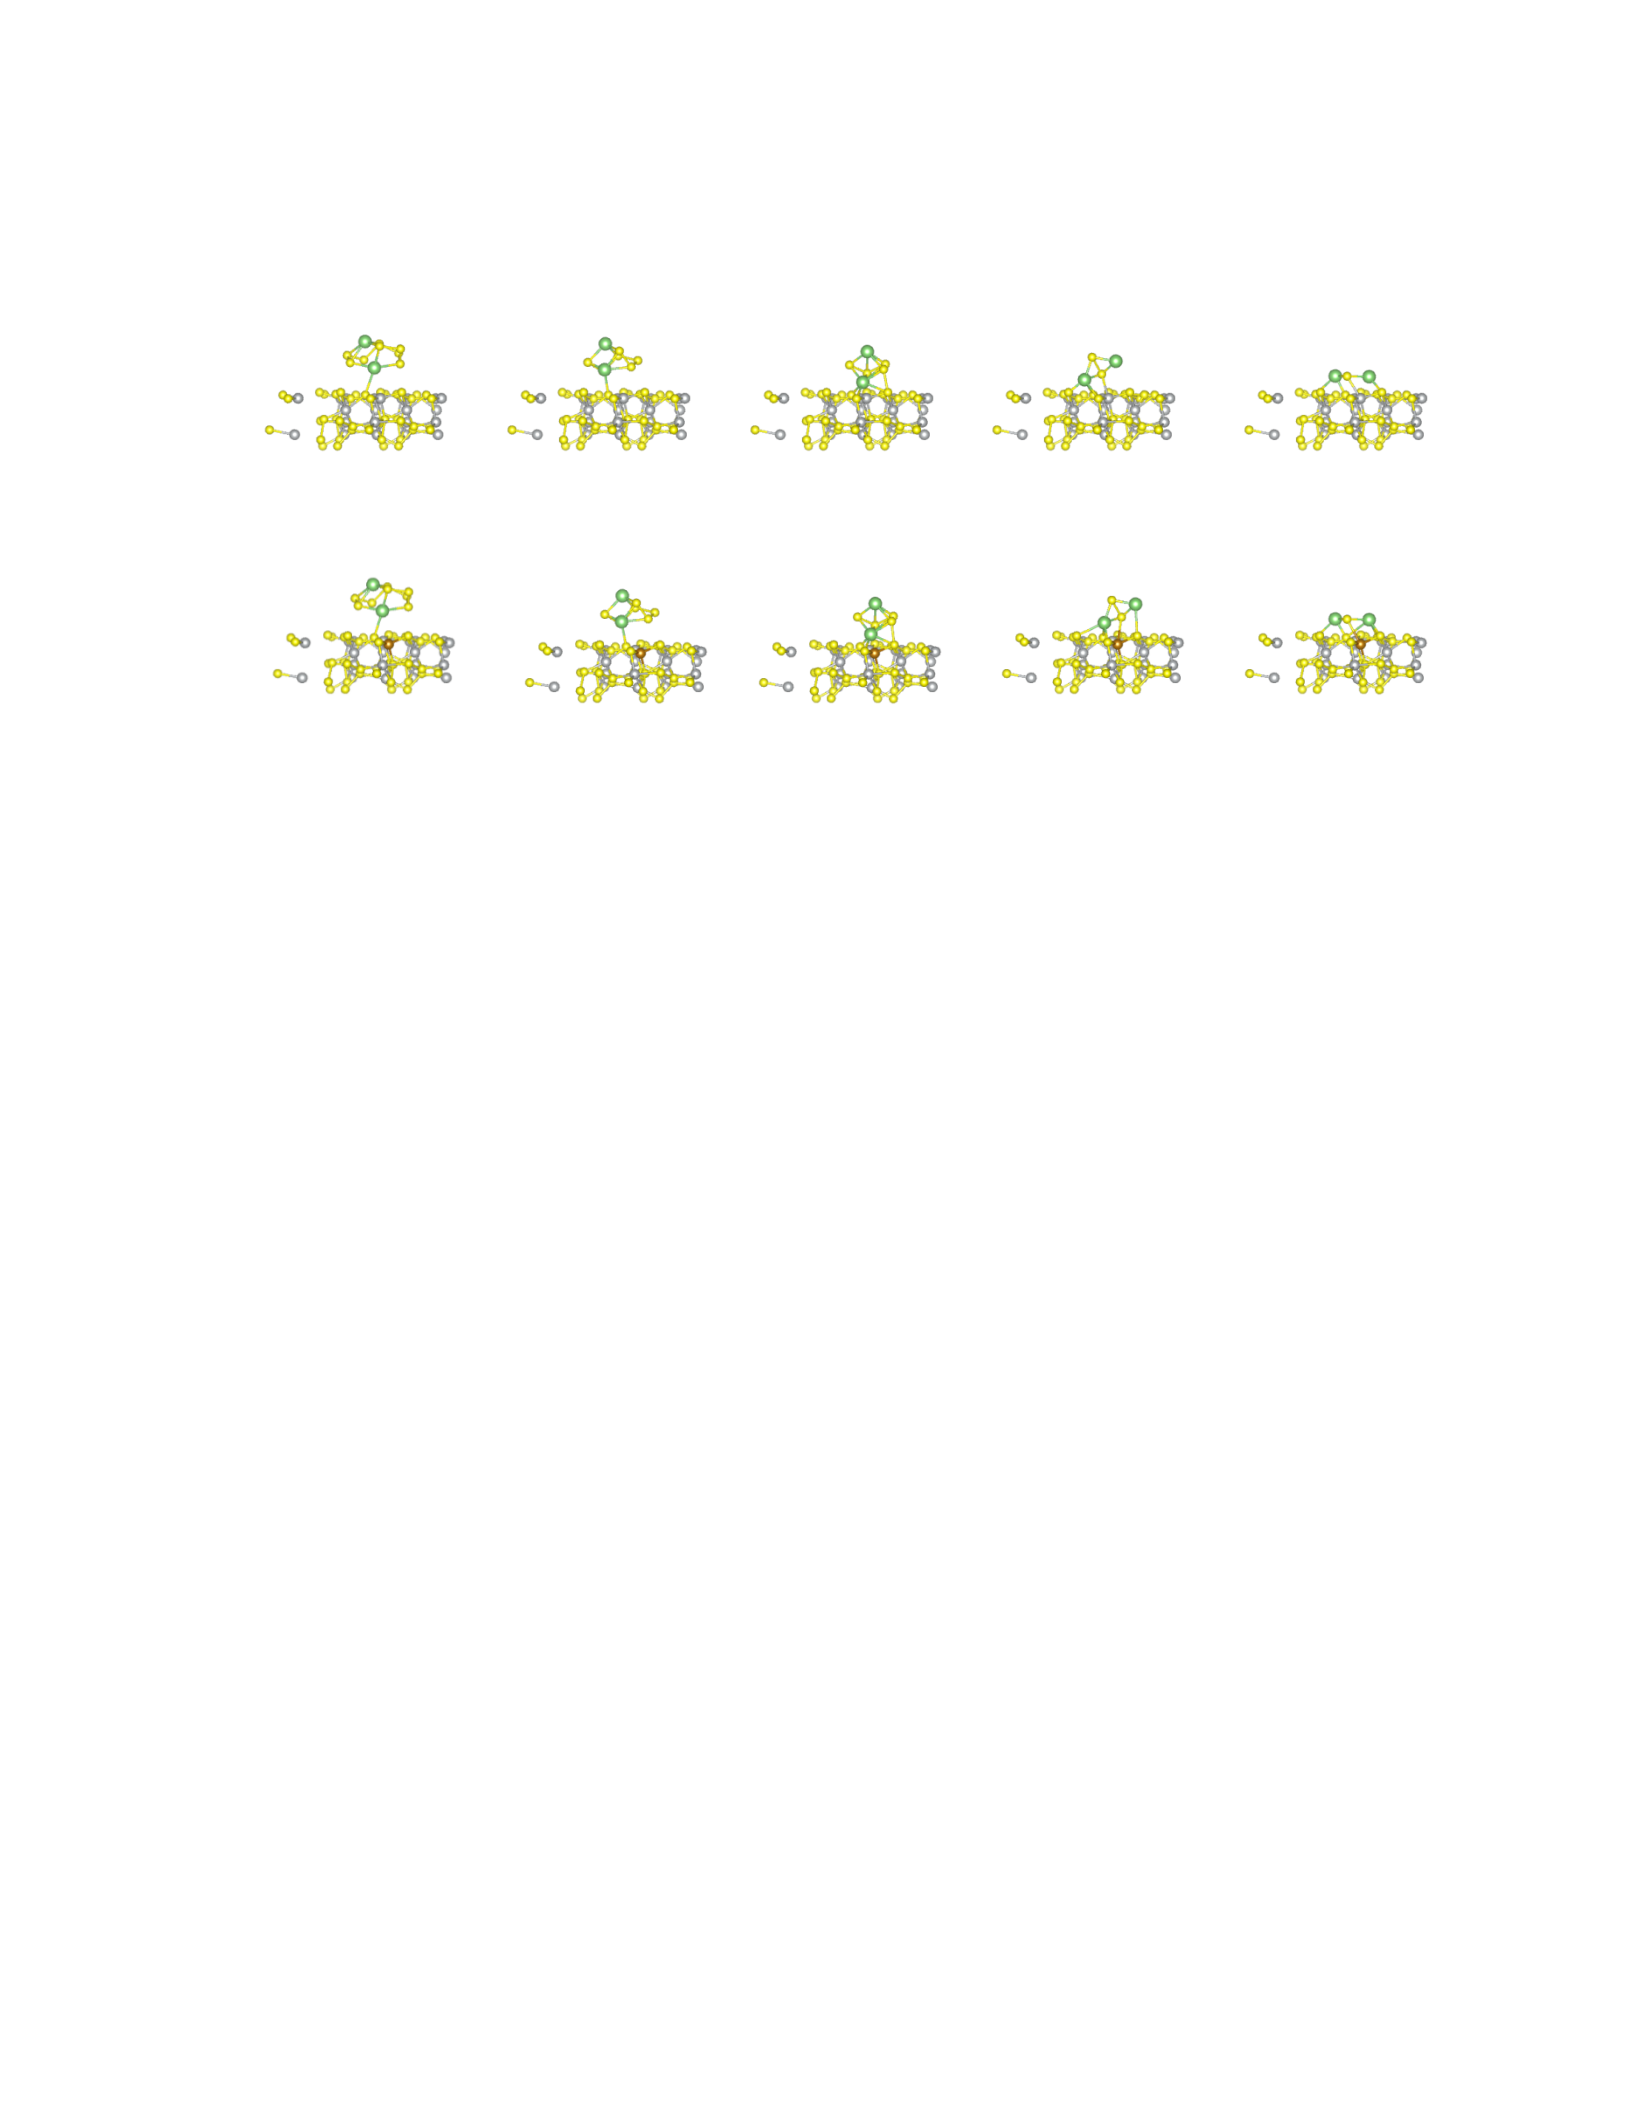
**

**Figure S5** Adsorption schematic of polysulfides on NiS2 and Fe-NiS2.


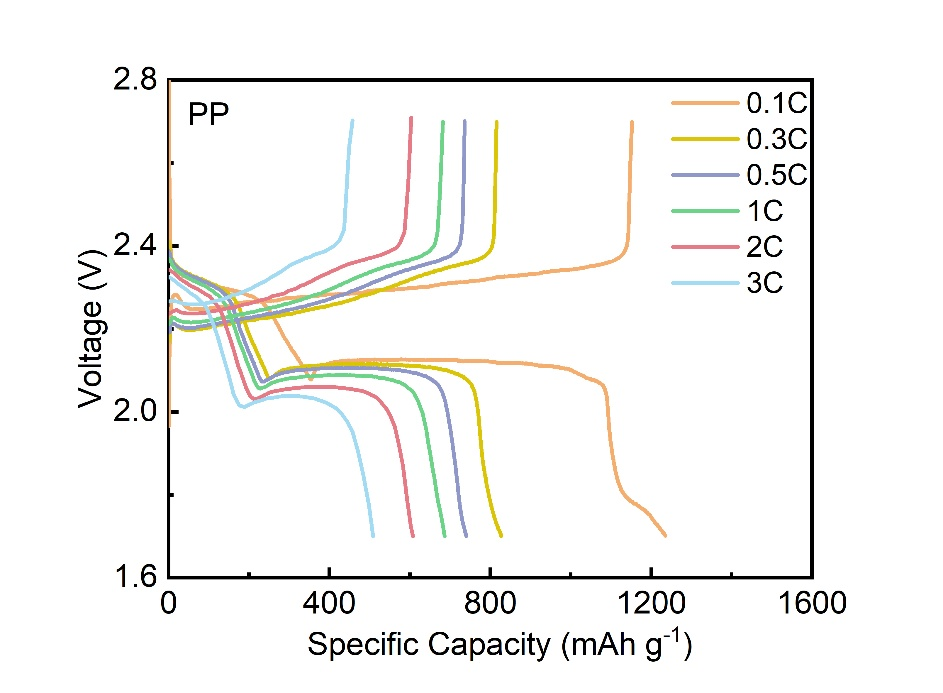


**Figure S6** GCD profiles of the PP separator cell recorded at different current rates.
